# Supplementary material
Source: Springer Nature journal article supplement (https://www.springermedizin.de/resource/supplementary/12885_2013_5283_MOESM1_ESM.pdf/9465620)
Supplement: MOESM1 [file 9465620]

**Additional Information Table S1A.** Study characteristics of articles included in the review investigating CAIX expression prevalences in breast cancer, *in situ* carcinoma, benign breast disease, and normal breast tissue.

| Reference                                           | Study population                                      |                     |                                                     | Patient and tumor characteristics |                         |             |    | Histology          |    |                        |        |        |         |          | IHC |     |       | Obs. |     |            |                            |      |
|-----------------------------------------------------|-------------------------------------------------------|---------------------|-----------------------------------------------------|-----------------------------------|-------------------------|-------------|----|--------------------|----|------------------------|--------|--------|---------|----------|-----|-----|-------|------|-----|------------|----------------------------|------|
|                                                     | First author<br>Year, Country of patient<br>inclusion | Inclusion<br>period | No. of<br>invasive<br>cancers<br>(+other<br>tissue) | Important<br>selection criteria   | Age(range/<br>SD)       | Tumor size* |    | Histological grade |    | LN <sup>+</sup><br>(%) | Normal | Benign | In situ | invasive | IDC | ILC | Other |      | TMA | Cores (mm) | Antibody<br>(manufacturer) |      |
|                                                     |                                                       |                     |                                                     |                                   |                         | pT          | 0% | 100%               | 0% |                        |        |        |         |          |     |     |       |      |     |            |                            | 100% |
| <b>Betof, A.S.[32]</b><br>2012, USA                 | (ns)                                                  | 207                 | -                                                   |                                   | 48(24-79)               | 1<br>2<br>3 |    | I<br>II<br>III     |    | 86                     | ○      | ○      | ○       | ●        | ○   | ○   | ○     | ○    |     |            | M75 (na)                   | 2    |
| <b>Choi, J.[33]</b><br>2013, South Korea            | 2000-2001                                             | 276                 | -                                                   |                                   | 49 <sup>a</sup> (11)    | ns          |    | I<br>II<br>III     |    | 45                     | ○      | ○      | ○       | ○        | ●   | ○   | ○     | ●    | 2   | 3.0        | ns (Abcam)                 | ns   |
| <b>Kornegoor, R.[34]</b><br>2012, The Netherlands   | 1986-2010                                             | 132                 | males                                               |                                   | 66 <sup>a</sup> (32-89) | 1<br>2/3    |    | I/II<br>III        |    | 54                     | ○      | ○      | ○       | ○        | ●   | ●   | ●     | ●    | 3   | 0.6        | ns (Abcam)                 | 2    |
| <b>Tafreshi, N.K.[35]</b><br>2012, USA              | ns                                                    | 89<br>(+51)         | -                                                   |                                   | ns                      | ns          |    | I<br>II<br>III     |    | 49                     | ●      | ○      | ●       | ○        | ●   | ○   | ○     | ●    | 2   | 0.6        | ns (Abcam)                 | 3    |
| <b>Vermeulen, J.F.[36]</b><br>2012, The Netherlands | 1997-2007                                             | 458                 | -                                                   |                                   | 60 <sup>a</sup> (28-88) | 1<br>2<br>3 |    | I<br>II<br>III     |    | 48                     | ○      | ○      | ○       | ○        | ●   | ●   | ●     | ●    | 3   | 0.6        | Ab15086<br>(Abcam)         | 1    |
| <b>Beketic-Oreskovic, L.[37]</b><br>2011, Croatia   | 1999-2005                                             | 40                  | -                                                   |                                   | 62(33-84)               | 1/2<br>3    |    | I<br>II<br>III     |    | 55                     | ○      | ○      | ○       | ○        | ●   | ○   | ○     | ○    |     |            | ns (Santa Cruz)            | 2    |
| <b>Fox, S.B.[38]</b><br>2011, Italy                 | 1997-2001                                             | 166                 | T2-4, N0-1                                          |                                   | ns                      | 1<br>2<br>3 |    | I<br>II<br>III     |    | 43                     | ○      | ○      | ○       | ●        | ○   | ○   | ○     | ●    | 2   | 1.0        | M75 (na)                   | 2    |
| <b>Hyseni, A.[39]</b><br>2011, The Netherlands      | ns                                                    | 92                  | -                                                   |                                   | 56(ns)                  | 20 (ns)     |    | I<br>II<br>III     |    | ns                     | ○      | ○      | ○       | ○        | ●   | ●   | ●     | ○    |     |            | ns (Abcam)                 | 1    |
| <b>Khurana, A.[40]</b><br>2011, USA                 | 199x-2003                                             | 53                  | -                                                   |                                   | 56(13)                  | ns          |    | I<br>II<br>III     |    | 100                    | ○      | ○      | ○       | ○        | ●   | ○   | ○     | ●    | ns  | ns         | Ab15086<br>(Abcam)         | ns   |
| <b>Lou, Y.[41]</b><br>2011, USA                     | ns                                                    | 3630                | -                                                   |                                   | ns                      | 1<br>2<br>3 |    | I<br>II<br>III     |    | 44                     | ○      | ○      | ○       | ●        | ○   | ○   | ○     | ●    | 1   | 0.6        | M75<br>(na)                | 2    |
| <b>Pinheiro, C.[42]</b><br>2011, Portugal           | ns                                                    | 122                 | -                                                   |                                   | ns                      | 1<br>2<br>3 |    | I<br>II<br>III     |    | 50                     | ○      | ○      | ○       | ●        | ○   | ○   | ○     | ●    | 2   | 2.0        | Ab15086<br>(Abcam)         | 2    |
| <b>Yan, M.[43]</b><br>2011, UK                      | ns                                                    | 448                 | -                                                   |                                   | 55(24-87)               | ns          |    | I<br>II<br>III     |    | 44                     | ○      | ○      | ○       | ●        | ○   | ○   | ○     | ○    |     |            | M75 (na)                   | ns   |
| <b>Zanetti, J.S.[44]</b>                            | 1994-2004                                             | 243                 | -                                                   |                                   | 55(25-85)               | 1<br>2      |    | I<br>II            |    | 53                     | ○      | ○      | ○       | ○        | ●   | ○   | ○     | ●    | ns  | 1.0        | ns (Abcam)                 | 2    |

|                                                       |           |              |                                      |                         |                |  |                |  |     |                 |     |     |  |  |  |  |                           |    |
|-------------------------------------------------------|-----------|--------------|--------------------------------------|-------------------------|----------------|--|----------------|--|-----|-----------------|-----|-----|--|--|--|--|---------------------------|----|
| 2011, Brazil                                          |           |              |                                      |                         | 3              |  | III            |  |     |                 |     |     |  |  |  |  |                           |    |
| <b>Chen, C.L.[45]</b><br>2010, Taiwan                 | ns        | 59<br>(+109) | -                                    | ns                      | 1/2<br>3       |  | I<br>II<br>III |  | 50  | ● ● ● ○ ● ○ ○ ○ |     |     |  |  |  |  | ns (Santa Cruz)           | ns |
| <b>Dachs, G.U.[46]</b><br>2010, New Zealand           | 2003-2007 | 28           | -                                    | 61(14)                  | 22 (13)        |  | I<br>II<br>III |  | 50  | ○ ○ ○ ○ ● ● ● ○ |     |     |  |  |  |  | ns (Novus<br>Biologicals) | 1  |
| <b>Jubb, A.M.[47]</b><br>2010, UK                     | 1989-1998 | 151          | -                                    | 57 <sup>a</sup> (27-80) | 1<br>2/3       |  | I<br>II<br>III |  | 43  | ○ ○ ○ ○ ● ● ● ● | ns  | ns  |  |  |  |  | M75 (na)                  | 2  |
| <b>Lancashire, L.J.[48]</b><br>2010, UK               | 1986-2000 | 712          | -                                    | ns                      | small<br>large |  | I<br>II<br>III |  | 43  | ○ ○ ○ ○ ● ● ● ⊙ | 2   | 0.6 |  |  |  |  | Ab15086<br>(Abcam)        | ns |
| <b>Koop, E.A.[49]</b><br>2009, The Netherlands        | 2004-2006 | 40           | -                                    | ns                      | 1<br>2/3       |  | I/II<br>III    |  | 58  | ○ ○ ○ ○ ● ● ● ○ |     |     |  |  |  |  | ns (Abcam)                | 2  |
| <b>Rakha, E.A.[50]</b><br>2009, UK                    | 1987-1998 | 232          | TN, T1-2                             | 50(25-70)               | ns             |  | I<br>II<br>III |  | 40  | ○ ○ ○ ○ ● ○ ○ ● | ns  | ns  |  |  |  |  | ns (Abcam)                | ns |
| <b>Tan, E.Y.[51]</b><br>2009, UK                      | ns        | 407          | -                                    | 55(24-87)               | 22 (ns)        |  | I<br>II<br>III |  | 46  | ○ ○ ○ ○ ● ● ● ● | ns  | 1.0 |  |  |  |  | M75 (na)                  | 2  |
| <b>Crabb, S.J.[52]</b><br>2008, Canada                | 1986-1992 | 281          | Clinically LN+                       | ns                      | 1<br>2<br>3    |  | I<br>II<br>III |  | 100 | ○ ○ ○ ○ ● ● ○ ● | ns  | 0.6 |  |  |  |  | M75 (na)                  | 2  |
| <b>van der Groep, P.[53]</b><br>2008, The Netherlands | ns        | 21           | BRCA1+ /<br>BRCA1+ in family         | ns                      | 1<br>2<br>3    |  | I<br>II<br>III |  | ns  | ○ ○ ○ ○ ● ● ● ○ |     |     |  |  |  |  | ns (Abcam)                | 1  |
| <b>Kyndi, M.[54]</b><br>2008, Denmark                 | 1982-1989 | 945          | -                                    | ns                      | 1<br>2<br>3    |  | I<br>II<br>III |  | 6   | ○ ○ ○ ○ ● ● ● ● | 1/2 | 1.0 |  |  |  |  | M75 (na)                  | 1  |
| <b>Garcia, S.[55]</b><br>2007, France                 | 1995-2002 | 923          | -                                    | 54 <sup>a</sup> (31-84) | 23 (7-45)      |  | I<br>II<br>III |  | 50  | ○ ○ ○ ○ ● ○ ○ ● | 2   | 0.6 |  |  |  |  | Ab15086<br>(Abcam)        | ns |
| <b>Hussain, S.A.[56]</b><br>2007, UK                  | ns        | 144          | -                                    | 62(29-94)               | 1<br>2/3       |  | I<br>II<br>III |  | 39  | ○ ○ ○ ● ○ ○ ○ ● | 4   | 4.0 |  |  |  |  | M75 (na)                  | 2  |
| <b>Tan, E.Y.[57]</b><br>2007, UK                      | ns        | 232          | -                                    | 57(29-90)               | 20 (2-230)     |  | I<br>II<br>III |  | 43  | ○ ○ ○ ○ ● ● ● ● | ns  | 1.0 |  |  |  |  | M75 (na)                  | 2  |
| <b>Trastour, C.[58]</b><br>2007, France               | 1993-1993 | 132          | -                                    | 62(28-87)               | 15 (2-100)     |  | I<br>II<br>III |  | 36  | ○ ○ ○ ○ ● ● ● ○ |     |     |  |  |  |  | MN75 (Bayer)              | 2  |
| <b>Brennan, D.J.[59]</b><br>2006, Sweden              | 1984-1991 | 400          | Pre-menopausal /<br><50 yr, stage II | 44(25-57)               | 1<br>2<br>3    |  | I<br>II<br>III |  | 73  | ○ ○ ○ ○ ● ● ● ● | 2   | 0.6 |  |  |  |  | M75 (na)                  | 2  |
| <b>Generali, D.[60]</b><br>2006, Italy                | 1997-2002 | 169          | T2-4, N0-1                           | ns                      | 1<br>2<br>3    |  | I<br>II<br>III |  | 43  | ○ ○ ○ ● ○ ○ ○ ● | 2   | 0.6 |  |  |  |  | M75 (na)                  | 2  |
| <b>Generali, D.[61]</b>                               | 1997-2002 | 169          | T2-4, N0-1                           | ns                      | 1              |  | I              |  | 43  | ○ ○ ○ ● ○ ○ ○ ● | 2   | 0.6 |  |  |  |  | M75 (na)                  | 2  |

|                                 |           |        |                   |                         |     |  |     |  |     |                 |  |  |  |  |  |  |  |                    |    |
|---------------------------------|-----------|--------|-------------------|-------------------------|-----|--|-----|--|-----|-----------------|--|--|--|--|--|--|--|--------------------|----|
| 2006, Italy                     |           |        |                   |                         | 2   |  | II  |  |     |                 |  |  |  |  |  |  |  |                    |    |
| <b>Vleugel, M.M.[62]</b>        | 1982-1994 | 183    | M-                | ns                      | ns  |  | ns  |  | 35  | ○ ○ ○ ○ ● ● ● ○ |  |  |  |  |  |  |  | M75 (na)           | 2  |
| 2006, The Netherlands           |           |        |                   |                         |     |  |     |  |     |                 |  |  |  |  |  |  |  |                    |    |
| <b>van den Eynden, G.G.[63]</b> | ns        | 60     | Clinically LN+    | 59 <sup>a</sup> (25-84) | 1   |  | I   |  | 100 | ○ ○ ○ ○ ● ● ● ○ |  |  |  |  |  |  |  | NB100-417A (Novus) | 1  |
| 2005, Belgium                   |           |        |                   |                         | 2   |  | II  |  |     |                 |  |  |  |  |  |  |  |                    |    |
|                                 |           |        |                   |                         | 3   |  | III |  |     |                 |  |  |  |  |  |  |  |                    |    |
| <b>Kuijper, A.[64]</b>          | ns        | 10     | including PT / FA | 34 <sup>a</sup> (11)    |     |  | ns  |  | ns  | ○ ● ○ ○ ○ ○ ● ○ |  |  |  |  |  |  |  | M75 (na)           | 2  |
| 2005, The Netherlands           |           | (+55)  |                   |                         |     |  |     |  |     |                 |  |  |  |  |  |  |  |                    |    |
| <b>Vleugel, M.M.[65]</b>        | 1982-1994 | 200    | -                 | ns                      | 1   |  | I   |  | 39  | ○ ○ ○ ○ ● ● ● ○ |  |  |  |  |  |  |  | M75 (na)           | 2  |
| 2005, The Netherlands           |           |        |                   |                         | 2   |  | II  |  |     |                 |  |  |  |  |  |  |  |                    |    |
|                                 |           |        |                   |                         | 3   |  | III |  |     |                 |  |  |  |  |  |  |  |                    |    |
| <b>Blackwell K.L.[66]</b>       | 1988-1995 | 35     | -                 | ns                      |     |  | ns  |  | ns  | ○ ○ ○ ● ○ ○ ○ ○ |  |  |  |  |  |  |  | M75 (na)           | ns |
| 2004, USA                       |           |        |                   |                         |     |  |     |  |     |                 |  |  |  |  |  |  |  |                    |    |
| <b>Cooper, C.[67]</b>           | ns        | 51     | ERα+              | ns                      | ns  |  | I   |  | ns  | ○ ○ ● ● ○ ○ ○ ○ |  |  |  |  |  |  |  | M75 (na)           | 2  |
| 2004, Canada                    |           |        |                   |                         |     |  | II  |  |     |                 |  |  |  |  |  |  |  |                    |    |
|                                 |           |        |                   |                         |     |  | III |  |     |                 |  |  |  |  |  |  |  |                    |    |
| <b>Colpaert, C.G.[68]</b>       | ns        | 129    | including IBC     | 54 <sup>a</sup> (25-83) |     |  | ns  |  | 66  | ○ ○ ○ ● ○ ○ ○ ○ |  |  |  |  |  |  |  | M75 (na)           | >1 |
| 2003, Belgium                   |           |        |                   |                         |     |  |     |  |     |                 |  |  |  |  |  |  |  |                    |    |
| <b>Tomes, L.[69]</b>            | ns        | 97     | -                 | ns                      | 1   |  | I   |  | 48  | ○ ○ ○ ○ ● ○ ○ ○ |  |  |  |  |  |  |  | M75 (na)           | 1  |
| 2003, Canada                    |           |        |                   |                         | 2   |  | II  |  |     |                 |  |  |  |  |  |  |  |                    |    |
|                                 |           |        |                   |                         | 3   |  | III |  |     |                 |  |  |  |  |  |  |  |                    |    |
| <b>Bartosova, M.[70]</b>        | 1998-1999 | 19     | -                 | 50 <sup>a</sup> (19-82) | ns  |  | ns  |  | ns  | ● ● ● ○ ● ● ● ○ |  |  |  |  |  |  |  | M75 (na)           | 2  |
| 2002, Slovakia                  |           | (+43)  |                   |                         |     |  |     |  |     |                 |  |  |  |  |  |  |  |                    |    |
| <b>Chia, S.K.[71]</b>           | 1989-1994 | 103    | -                 | 59(28-82)               | 1   |  | I   |  | 56  | ○ ○ ○ ○ ● ● ● ○ |  |  |  |  |  |  |  | M75 (na)           | 1  |
| 2001, UK                        |           |        |                   |                         | 2/3 |  | II  |  |     |                 |  |  |  |  |  |  |  |                    |    |
|                                 |           |        |                   |                         |     |  | III |  |     |                 |  |  |  |  |  |  |  |                    |    |
| <b>Wykoff, C.C.[9]</b>          | 1997-1999 | 14     | -                 | ns                      | na  |  | na  |  | ns  | ● ○ ● ○ ● ○ ○ ○ |  |  |  |  |  |  |  | M75 (na)           | 1  |
| 2001, UK                        |           | (+115) |                   |                         |     |  |     |  |     |                 |  |  |  |  |  |  |  |                    |    |

a: mean; \*: mean size in mm (range or SD); b: nuclear grade; ns: not stated; na: not applicable; ○: tissue not investigated; ●: tissue investigated; ◎: both TMA and full sections investigated; IDC: invasive ductal carcinoma; ILC: invasive lobular carcinoma; IBC: inflammatory breast cancer; ABC: advanced breast cancer; TN: triple negative; LN: lymph node; TMA: tissue microarray PT: phyllodes tumors FA: fibroadenoma; M: distant metastasis, Obs.: number of observers evaluating staining result, +: positive; -: negative
